# Supplementary material for: Differential routing and disposition of the long-chain saturated fatty acid palmitate in rodent vs human beta-cells
Source: PubMed Central journal article supplement (PMC9021209; doi:10.1038/s41387-022-00199-y), 2022-04-20
Supplement: 41387_2022_199_MOESM1_ESM.pdf [file 41387_2022_199_MOESM1_ESM.pdf]

| <b>Table S1: Antibodies used within this study</b> |                                                         |                                                                                                                                             |
|----------------------------------------------------|---------------------------------------------------------|---------------------------------------------------------------------------------------------------------------------------------------------|
| <b>Primary Antibody</b>                            | <b>Manufacturer, host and clonality</b>                 | <b>Conditions and secondary detection system</b>                                                                                            |
| <b>PLIN2</b>                                       | Progen GP40<br>Guinea pig polyclonal                    | Immunofluorescent staining (1:100 for 16h at 4°C) using Fluor-conjugated goat anti-guinea pig secondary antibody (1:400 for 1h; Invitrogen) |
| <b>pelF2<math>\alpha</math></b>                    | Cell Signalling Technologies 3398P<br>Rabbit monoclonal | Western blotting (1:1000 for 16h at 4°C) using HRP-linked anti-rabbit secondary antibody (1:5000 for 1h; Agilent Dako)                      |
| <b>Total eIF2<math>\alpha</math></b>               | Cell Signalling Technologies 5324P<br>Rabbit monoclonal | Western blotting (1:1000 for 16h at 4°C) using HRP-linked anti-rabbit secondary antibody (1:5000 for 1h; Agilent Dako)                      |
| <b>CHOP (INS-1)</b>                                | Santa Cruz sc-575<br>Rabbit polyclonal                  | Western blotting (1:200 for 16h at 4°C) using HRP-linked anti-rabbit secondary antibody (1:5000 for 1h; Agilent Dako)                       |
| <b>CHOP (EndoC-<math>\beta</math>H1)</b>           | Proteintech Europe 15204-1-AP<br>Rabbit Polyclonal      | Western blotting (1:500 for 16h at 4°C) using HRP-linked anti-rabbit secondary antibody (1:5000 for 1h; Agilent Dako)                       |
| <b>GAPDH</b>                                       | Hyttest 5G4<br>Mouse monoclonal                         | Western blotting (1:10,000 for 16h at 4°C) using HRP-linked anti-mouse secondary antibody (1:5000 for 1h; Thermo Fisher Scientific)         |

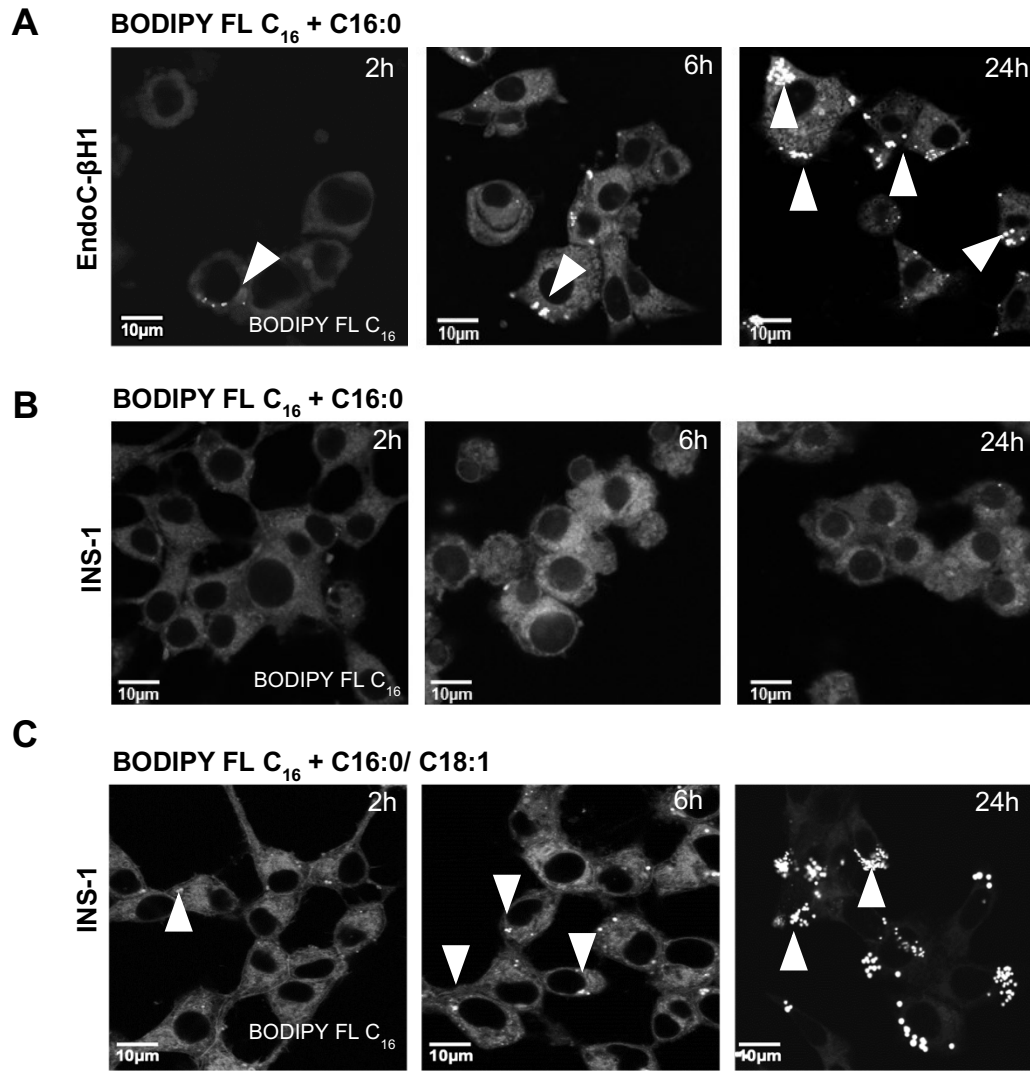

**S2:** Representative images of EndoC-βH1 (**A**) and INS-1 cells (**B**) exposed to C16:0 [500μM] BODIPY FL C<sub>16</sub> [400nM] alone or in combination with 250μM C18:1 for 2h, 6h or 24h. Scale bars 10μm.

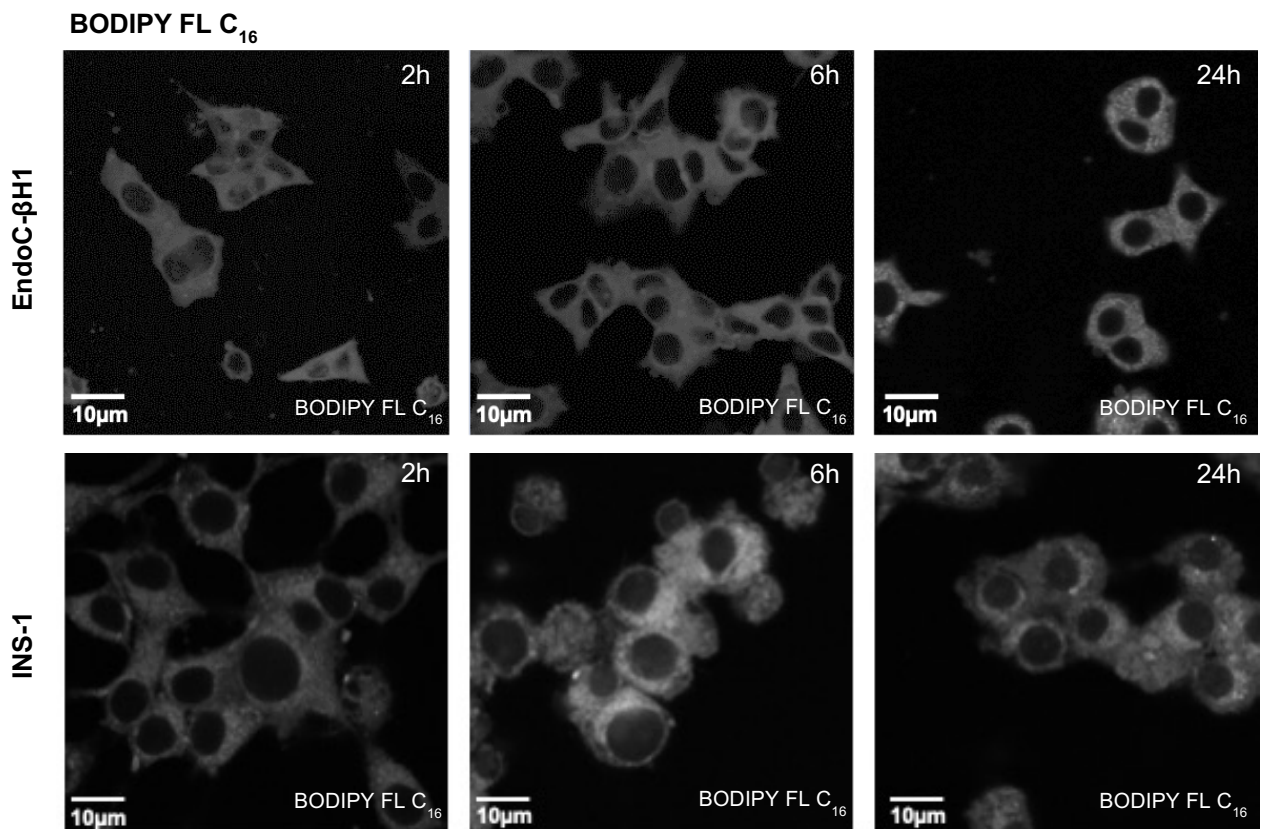

**S3:** Representative images of EndoC-βH1 (**A**) and INS-1 cells (**B**) exposed to the BODIPY FL C<sub>16</sub> [400nM] tracer only for 2h, 6h or 24h. Scale bars 10µm.

C16:0 [250 $\mu$ M] 6h

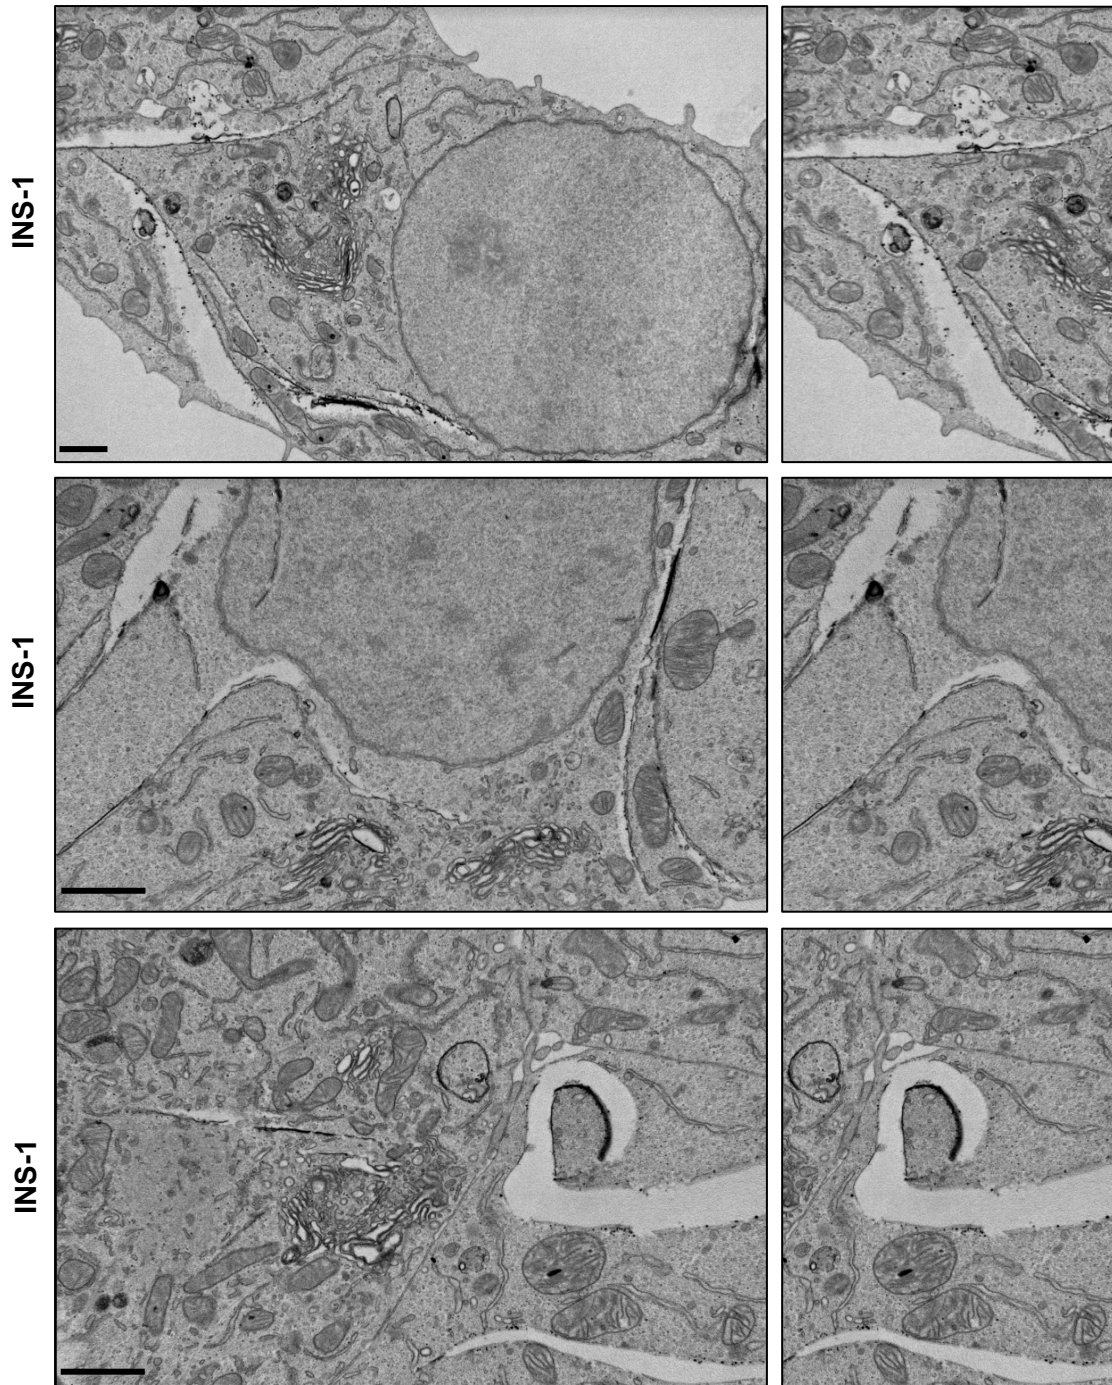

**S4:** The effect of C16:0 on intracellular membrane morphology in INS-1 cells. INS-1 cells were treated for 6hrs with 250 $\mu$ M C16:0. INS-1 cells were then fixed in an osmium tetroxide fixative before being imaged with TEM. Scale bar represents 1 $\mu$ m.



**A Vehicle 6h**

INS-1

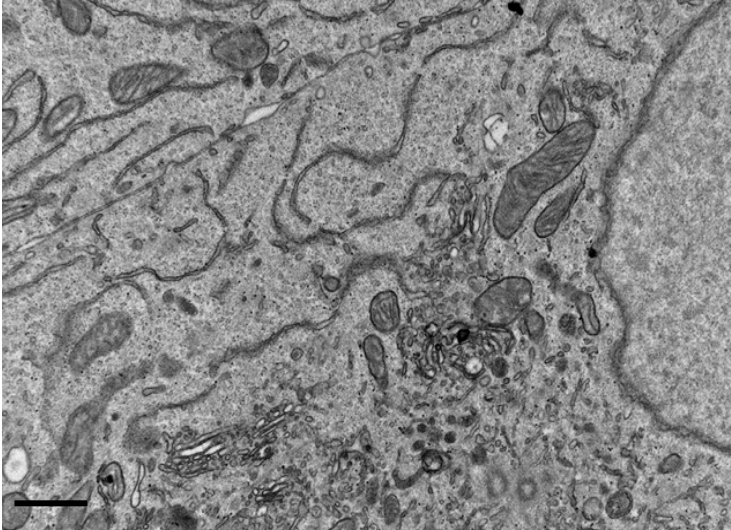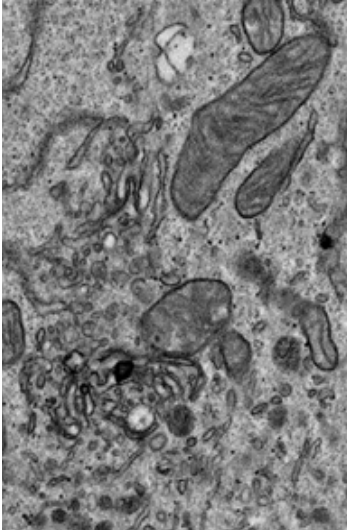

INS-1

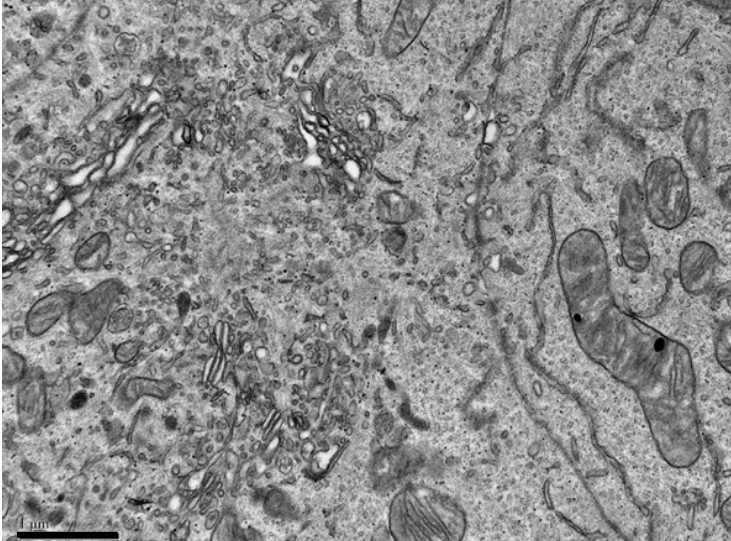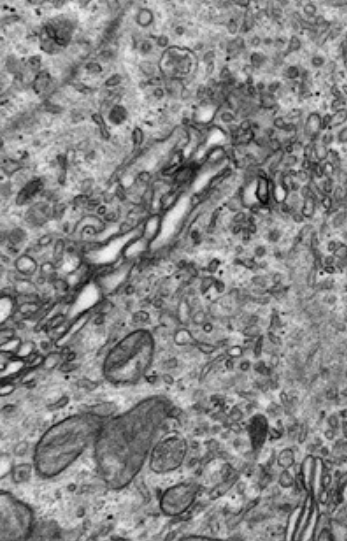

INS-1

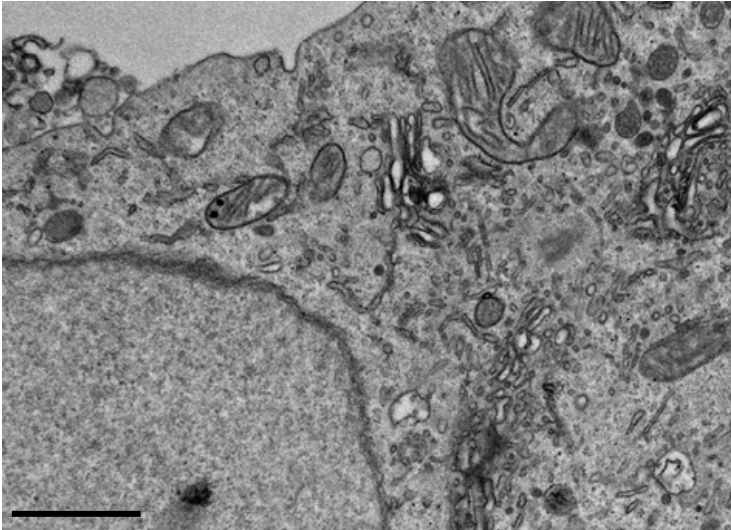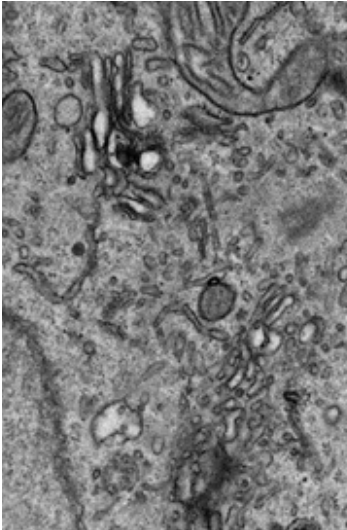

**B C16:0 [250 $\mu$ M] 6h**

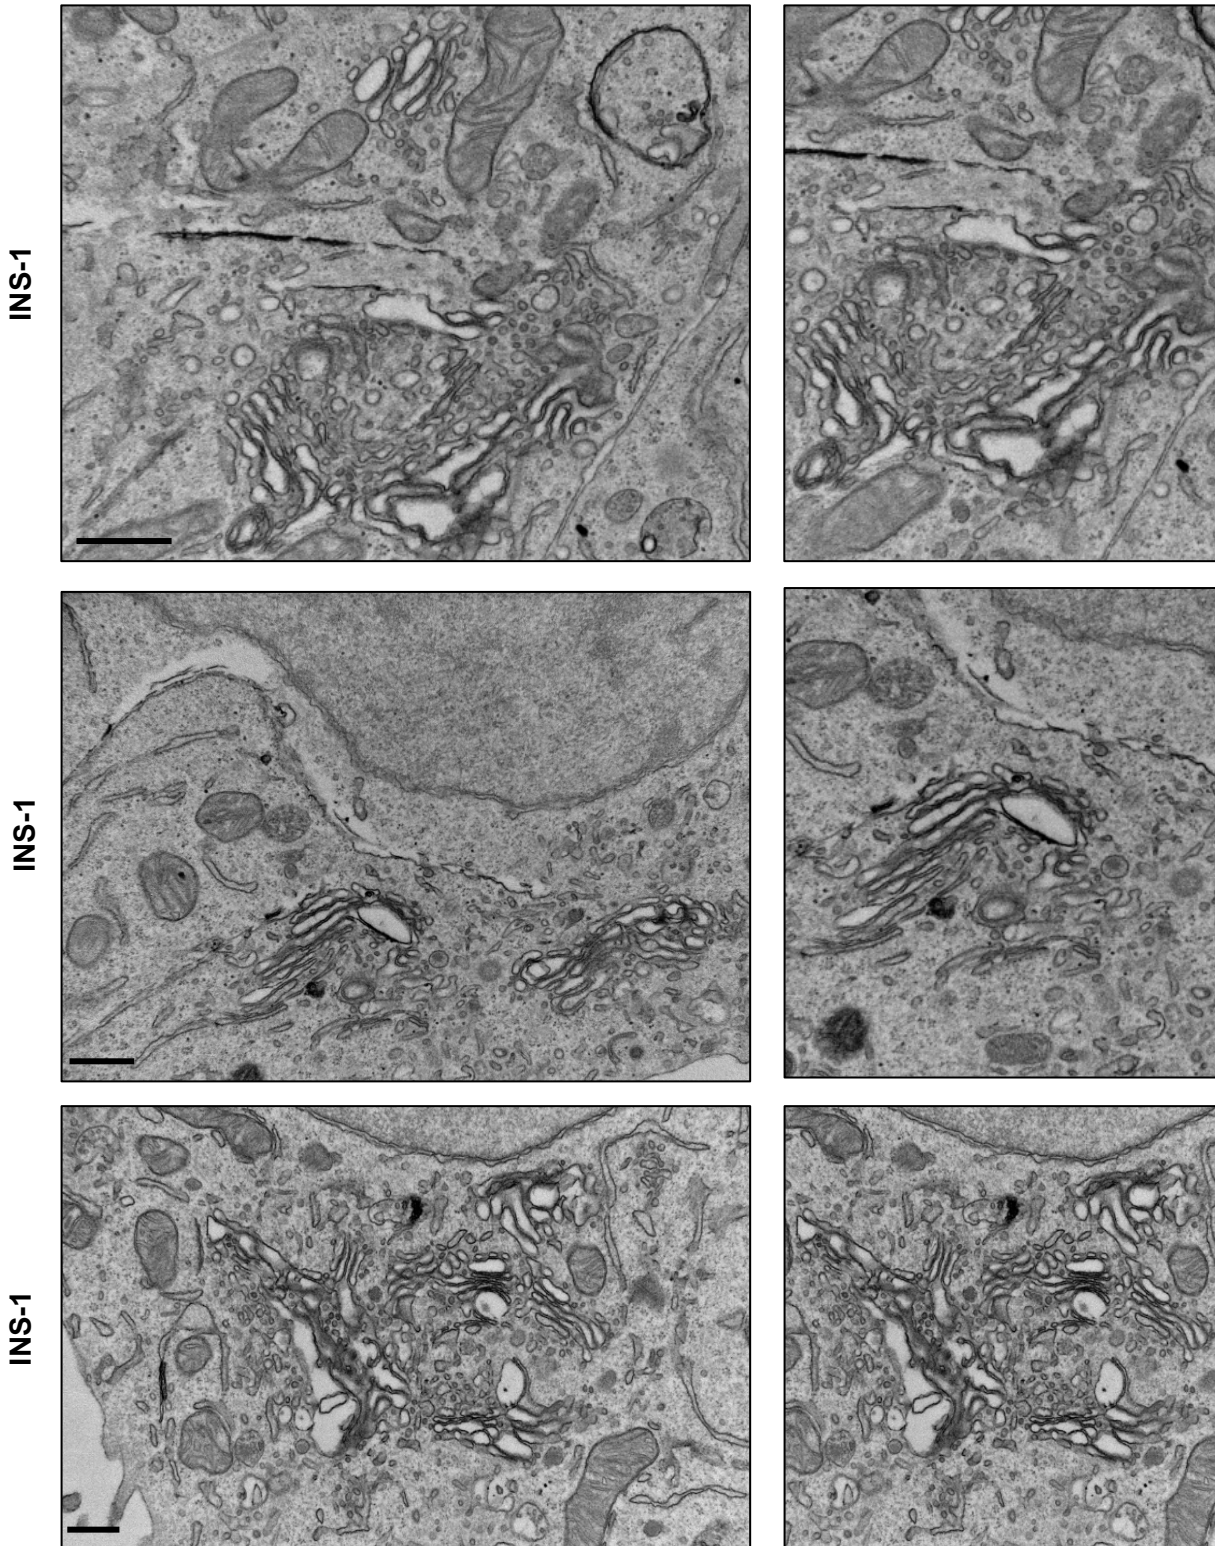

**S5:** The effect of C16:0 on Golgi morphology in INS-1 cells. INS-1 cells were treated for 6hrs with either vehicle control (**A**) or 250 $\mu$ M C16:0 (**B**). INS-1 cells were then fixed in an osmium tetroxide fixative before being imaged with TEM. Scale bar represents 1 $\mu$ m.



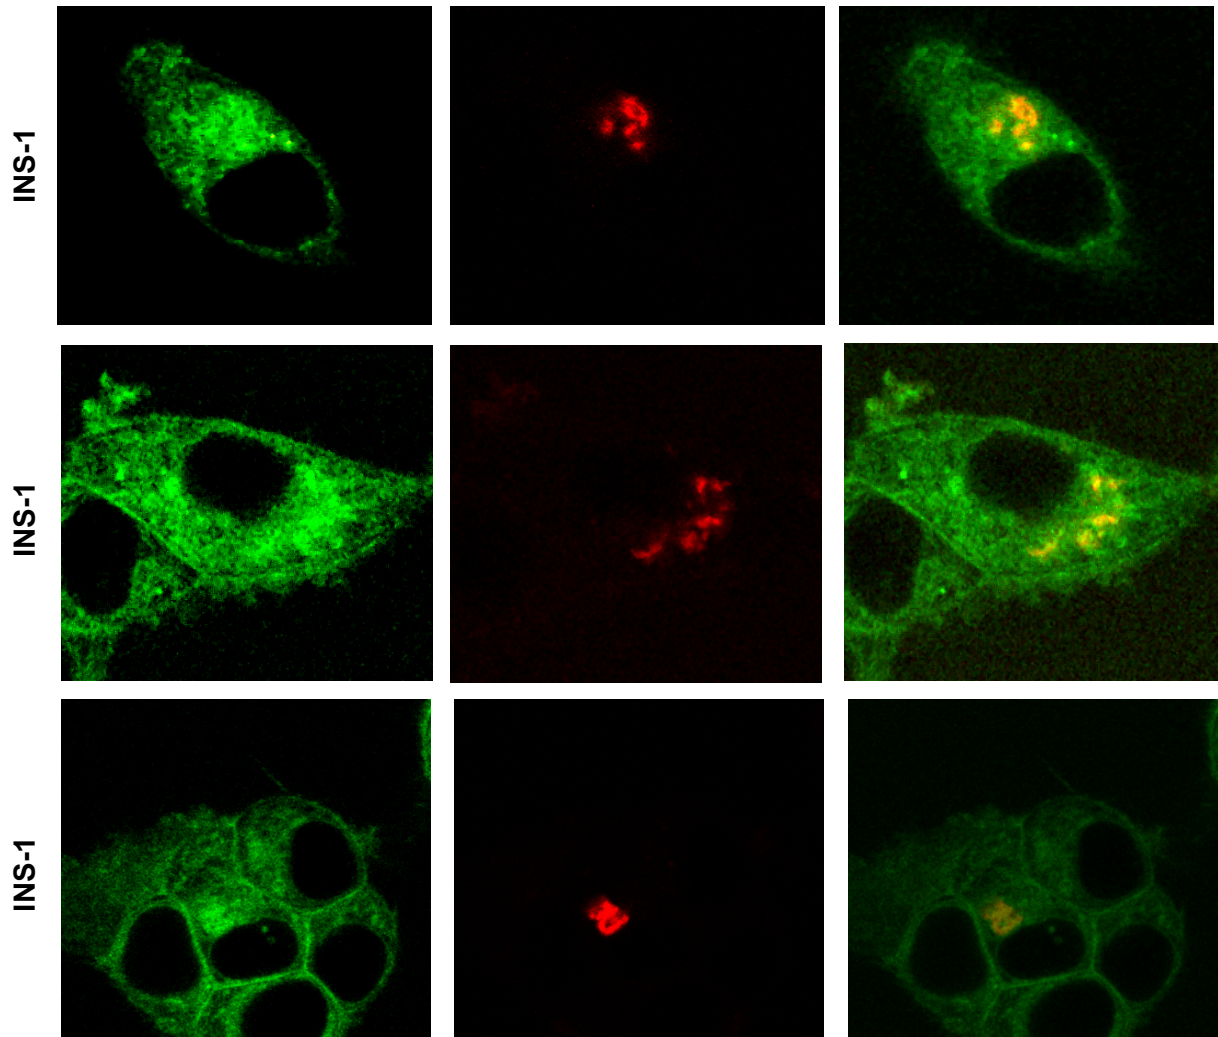

**S6:** Confocal fluorescent images of INS-1 cells where the Golgi apparatus was stained with CellLight Golgi-RFP and the cells exposed to BODIPY FL C<sub>16</sub> with 250 $\mu$ M C16:0 for 24h.

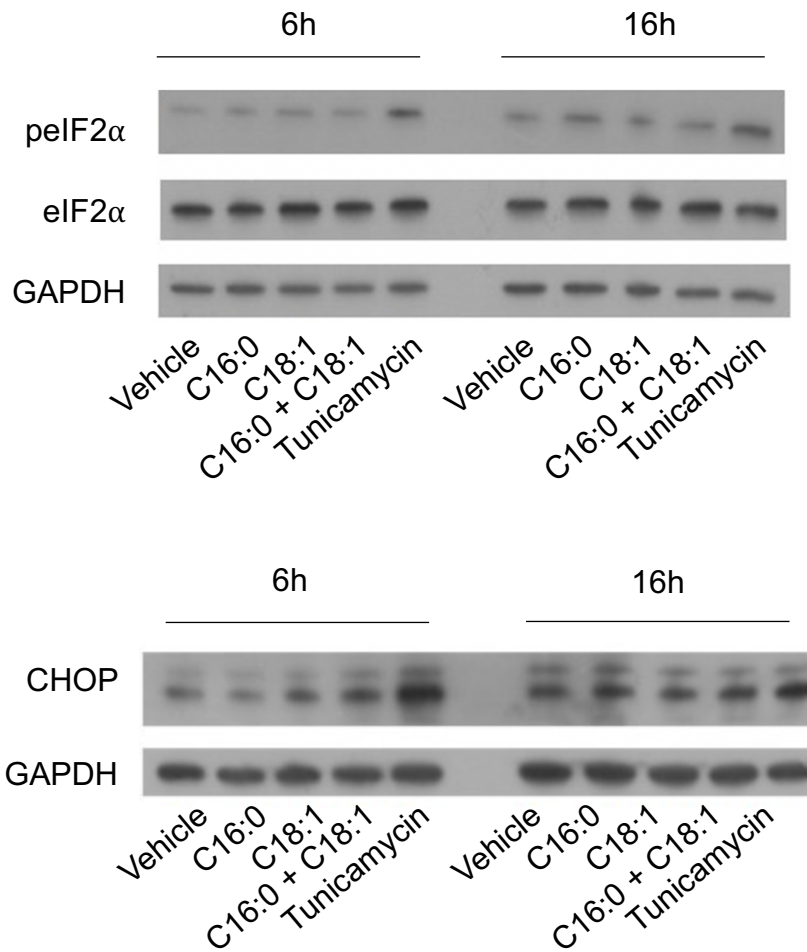

**S7:** Sample blots to show that LC-FFA do not activate ER stress in rodent INS-1 cells. INS-1 cells were treated with either 250µM C16:0, 250µM C18:1, 250µM 16:0 + 250µM C18:1, or 5µg/ml Tunicamycin for 6h or 16h. Total eIF2α, pEIF2α, CHOP and GAPDH levels were analysed by Western blotting.

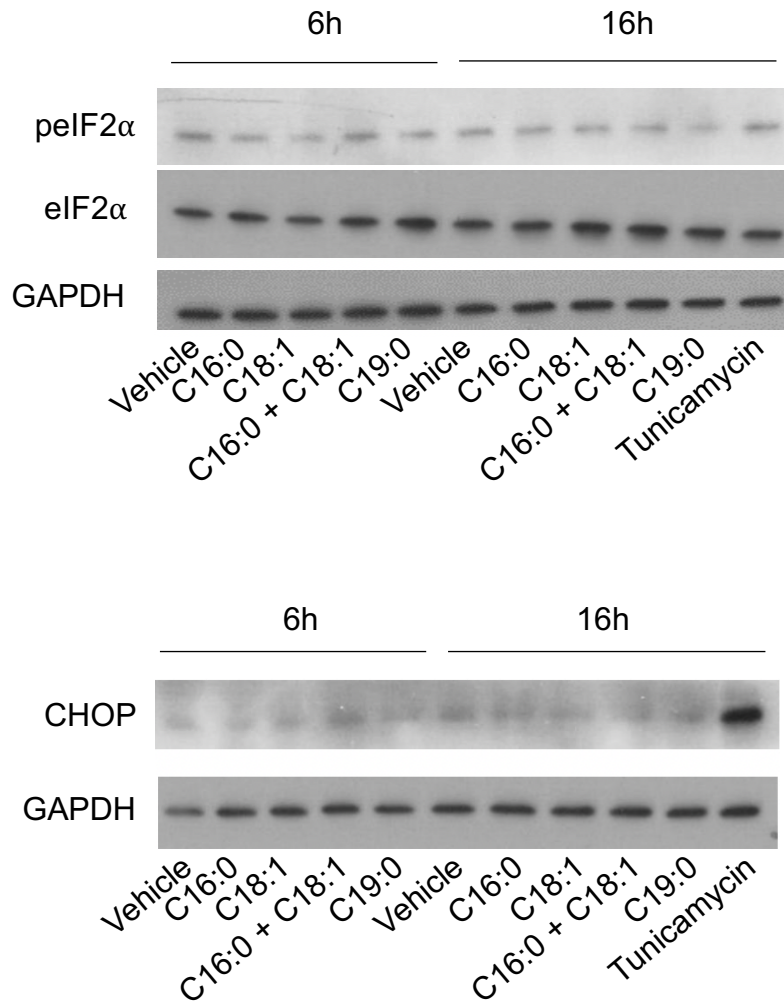

**S8:** Sample blots to show that LC-FFA do not activate ER stress in human EndoC- $\beta$ H1 cells. EndoC- $\beta$ H1 cells were treated with either 250 $\mu$ M C16:0, 250 $\mu$ M C18:1, 250 $\mu$ M C19:0, 250 $\mu$ M C16:0 + 250 $\mu$ M C18:1, or 5  $\mu$ g/ml Tunicamycin for 6h or 18h. Total eIF2 $\alpha$ , pEIF2 $\alpha$ , CHOP and GAPDH levels were analysed by Western blotting.
