# Supplementary material for: Differential routing and disposition of the long-chain saturated fatty acid palmitate in rodent vs human beta-cells
Source: PubMed Central journal article supplement (PMC9021209; doi:10.1038/s41387-022-00199-y), 2022-04-20
Supplement: 41387_2022_199_MOESM2_ESM.pdf [file 41387_2022_199_MOESM2_ESM.pdf]

**Raw data for Fig. 1: Effects of palmitate (C16:0) on the viability of immortal rodent-derived INS-1 and human-derived EndoC- $\beta$ H1  $\beta$ -cells.**

**Fig. 1A. INS-1 C16:0**

| Concentration | 0   | 125  | 250  | 500  |
|---------------|-----|------|------|------|
|               | 3   | 13   | 19   | 64   |
|               | 2   | 7    | 16   | 68   |
|               | 3   | 10   | 18   | 69   |
|               | 6.8 | 7    | 22.5 | 57   |
|               | 4.8 | 7.7  | 22.2 | 47.8 |
|               | 7.4 | 16.6 | 18.6 | 60.5 |
|               | 7.3 | 10.6 | 17.1 | 52.3 |
|               | 5.9 | 8.4  | 21.6 | 54.4 |
|               | 6.4 | 7.3  | 19.1 | 58.9 |

**Fig. 1B. INS-1 C16:0 + C18:1**

| Concentration | Vehicle | C16:0 | C18:1 | C16:0+C18:1 |
|---------------|---------|-------|-------|-------------|
|               | 1.5     | 14.3  | 2.8   | 2.7         |
|               | 3.8     | 26    | 4.1   | 2.2         |
|               | 3.2     | 13.4  | 3.6   | 3           |
|               | 2.5     | 12.4  | 6.4   | 2.5         |
|               | 4.2     | 13.7  | 3.7   | 2.6         |
|               | 2.5     | 12.59 | 4.1   | 2.6         |
|               | 6.53    | 8.5   | 4.17  | 2.22        |
|               | 5.49    | 10.06 | 2.8   | 1.75        |
|               | 3.48    |       | 4.77  | 2.66        |

**Fig.1C. EndoC- $\beta$ H1 C16:0**

| Concentration | 0    | 250  | 500  | 1000 |
|---------------|------|------|------|------|
|               | 19.5 | 12.4 | 11.9 | 9.5  |
|               | 12.7 | 11.1 | 9.6  | 7.3  |
|               | 10.3 | 9.7  | 19.5 | 10.2 |
|               | 16.4 | 19   | 10.4 | 9.3  |
|               | 18.1 | 19.8 | 8    | 8.6  |
|               | 9.4  |      | 7.4  | 8.9  |
|               | 6.2  |      | 6.4  | 22.2 |
|               | 2.9  |      | 5.4  | 14.5 |
|               | 5.7  |      | 6.1  | 9.1  |
|               | 4    |      | 6.1  |      |
|               | 3.9  |      | 8.6  |      |
|               | 5.9  |      | 7.6  |      |
|               | 4.7  |      | 7.9  |      |
|               | 4.2  |      | 17.7 |      |
|               | 12.2 |      | 14.6 |      |
|               | 11   |      | 15.9 |      |
|               | 11.7 |      |      |      |

**Raw data for Fig. 2A: Quantification of the total are of EndoC-βH1 cells covered by fluorescent puncta after treatment with C16:0 (500μM) and BODIPY FL C16 (400nM).**

**A. EndoC-βH1 C16:0 lipid droplet (% total area of the cell covered by lipid droplet)**

| <b>2h</b> | <b>BODIPY FL C<sub>16</sub></b> | <b>BODIPY FL C<sub>16</sub> + C16:0</b> | <b>BODIPY FL C<sub>16</sub> + C18:1</b> |
|-----------|---------------------------------|-----------------------------------------|-----------------------------------------|
|           | 0.00                            | 0.77                                    | 0.90                                    |
|           | 0.00                            | 0.00                                    | 0.00                                    |
|           | 0.00                            | 1.78                                    | 3.08                                    |
|           | 0.00                            | 0.00                                    | 2.91                                    |
|           | 0.00                            | 0.00                                    | 2.47                                    |
|           | 0.00                            | 0.00                                    | 2.37                                    |
|           | 0.00                            | 0.00                                    | 1.64                                    |
|           | 0.00                            | 0.00                                    | 0.00                                    |
|           | 0.00                            | 0.00                                    |                                         |
|           | 0.00                            | 0.00                                    |                                         |

  

| <b>6h</b> | <b>BODIPY FL C<sub>16</sub></b> | <b>BODIPY FL C<sub>16</sub> + C16:0</b> | <b>BODIPY FL C<sub>16</sub> + C18:1</b> |
|-----------|---------------------------------|-----------------------------------------|-----------------------------------------|
|           | 0.00                            | 0.00                                    | 3.67                                    |
|           | 0.00                            | 0.00                                    | 5.61                                    |
|           | 0.00                            | 0.00                                    | 5.54                                    |
|           | 0.00                            | 0.00                                    | 2.44                                    |
|           | 0.00                            | 0.00                                    | 0.00                                    |
|           | 0.00                            | 0.00                                    | 0.00                                    |
|           | 0.00                            | 0.00                                    |                                         |
|           | 0.00                            | 0.00                                    |                                         |
|           | 0.00                            | 0.00                                    |                                         |
|           | 0.00                            | 0.00                                    |                                         |

  

| <b>24h</b> | <b>BODIPY FL C<sub>16</sub></b> | <b>BODIPY FL C<sub>16</sub> + C16:0</b> | <b>BODIPY FL C<sub>16</sub> + C18:1</b> |
|------------|---------------------------------|-----------------------------------------|-----------------------------------------|
|            | 0.00                            | 0.00                                    | 4.13                                    |
|            | 0.00                            | 0.00                                    | 4.79                                    |
|            | 0.00                            | 0.00                                    | 5.04                                    |
|            | 0.00                            | 0.00                                    | 9.72                                    |
|            | 0.00                            | 0.00                                    | 7.31                                    |
|            | 0.00                            | 0.00                                    | 4.31                                    |
|            | 0.00                            | 0.00                                    | 4.09                                    |
|            | 0.00                            | 0.00                                    |                                         |
|            | 0.00                            | 0.00                                    |                                         |
|            | 0.00                            | 0.00                                    |                                         |

Raw data for Fig. 2B: Quantification of the total area of INS-1E cells covered by fluorescent puncta after treatment with C16:0 (500µM) and BODIPY FL C16 (400nM) alone or in combination with 250µM C18:1.

| 2h | BODIPY FL C <sub>16</sub> | BODIPY FL C <sub>16</sub> + C16:0 |
|----|---------------------------|-----------------------------------|
|    | 0.00                      | 1.22                              |
|    | 0.00                      | 1.22                              |
|    | 0.00                      | 2.79                              |
|    | 0.00                      | 1.36                              |
|    | 0.00                      | 4.65                              |
|    | 0.00                      | 0.90                              |
|    | 0.00                      | 0.69                              |
|    | 0.00                      | 0.00                              |
|    | 0.00                      | 0.00                              |
|    | 0.00                      | 0.00                              |

| 6h | BODIPY FL C <sub>16</sub> | BODIPY FL C <sub>16</sub> + C16:0 |
|----|---------------------------|-----------------------------------|
|    | 0.00                      | 2.15                              |
|    | 0.00                      | 1.05                              |
|    | 0.00                      | 4.10                              |
|    | 0.00                      | 6.84                              |
|    | 0.00                      | 4.34                              |
|    | 0.00                      | 1.90                              |
|    | 0.00                      | 6.30                              |
|    | 0.00                      | 2.74                              |
|    | 0.00                      | 1.91                              |
|    | 0.00                      | 3.76                              |
|    |                           | 2.08                              |

| 24h | BODIPY FL C <sub>16</sub> | BODIPY FL C <sub>16</sub> + C16:0 |
|-----|---------------------------|-----------------------------------|
|     | 0.00                      | 9.49                              |
|     | 0.00                      | 11.67                             |
|     | 0.00                      | 5.54                              |
|     | 0.00                      | 13.84                             |
|     | 0.00                      | 17.45                             |
|     | 0.00                      | 8.92                              |
|     | 0.00                      | 11.93                             |
|     | 0.00                      | 15.46                             |
|     | 0.00                      | 18.23                             |
|     | 0.00                      | 12.69                             |
|     | 0.00                      | 9.35                              |
|     | 0.00                      | 10.02                             |
|     |                           | 5.19                              |

**Raw data for Fig. 2C: Pearson correlation coefficient to demonstrate the co-localisation of BODIPY FL C16 with PLIN2 in EndoC- $\beta$ H1 and INS-1E cells treated with C16:0 +/- C18:1.**

| <b>EndoC-<math>\beta</math>H1 C16:0</b> | <b>INS-1E C16:0</b> | <b>INS-1E C16:0+C18:1</b> |
|-----------------------------------------|---------------------|---------------------------|
| 0.64                                    | 0.2                 | 0.69                      |
| 0.51                                    | 0.21                | 0.58                      |
| 0.55                                    | 0.08                | 0.73                      |
| 0.74                                    | 0.33                | 0.79                      |
| 0.567                                   | 0.13                | 0.71                      |
| 0.58                                    | 0.38                | 0.49                      |

**Raw data for Fig. 4C: Pearson correlation coefficient to demonstrate the co-localisation of BODIPY FL C16 and CellLight Golgi-RFP in EndoC- $\beta$ H1 and INS-1E cells treated with C16:0 +/- C18:1.**

| <b>INS-1 C16:0</b> | <b>EndoC-<math>\beta</math>H1 C16:0</b> |
|--------------------|-----------------------------------------|
| 0.64               | 0.26                                    |
| 0.57               | 0.3                                     |
| 0.49               | 0.01                                    |
| 0.68               | 0.23                                    |
| 0.67               | 0.3                                     |

Raw data for Fig. 5A-D: INS-1E cells were treated with either 250 $\mu$ M C16:0, 250 $\mu$ M C18:1, 250 $\mu$ M C19:0, 250 $\mu$ M C16:0 + 250 $\mu$ M C18:1, or 5 $\mu$ g/ml Tunicamycin for 6h or 16h. Total eIF2 $\alpha$ , peIF2 $\alpha$ , CHOP and GAPDH levels were analysed by Western blotting and quantified as peIF2 $\alpha$ /total eIF2 $\alpha$  ratio or CHOP/GAPDH ratio.

**A. INS-1 peif2 $\alpha$ /eif 6h**

| Vehicle  | C16.0    | C18.1    | C16.0+C18.1 | Tunicamycin |
|----------|----------|----------|-------------|-------------|
| 0.34648  | 0.359425 | 0.371968 | 0.246501    | 0.61561     |
| 0.116273 | 0.188032 | 0.100138 | 0.056933    | 0.35473     |
| 0.235421 | 0.305675 | 0.174448 | 0.090487    | 0.767011    |
| 0.231006 | 0.35988  | 0.352319 | 0.332568    | 0.809762    |

**B. INS-1 peif2 $\alpha$ /eif 16h**

| Vehicle  | C16.0    | C18.1    | C16.0+C18.1 | Tunicamycin |
|----------|----------|----------|-------------|-------------|
| 0.098459 | 0.119771 | 0.153359 | 0.115623    | 0.602362    |
| 0.079686 | 0.104778 | 0.110982 | 0.084102    | 0.563482    |
| 0.377515 | 0.377772 | 0.223857 | 0.240524    | 1.248146    |
| 0.346243 | 0.448156 | 0.704467 | 0.560031    | 0.994813    |
| 0.586535 | 0.734115 | 0.58094  | 0.560343    | 1.360326    |

**C. INS-1 CHOP 6h**

| Vehicle  | C16.0    | C18.1    | C16.0+C18.1 | Tunicamycin |
|----------|----------|----------|-------------|-------------|
| 0.284053 | 0.575032 | 0.429228 | 0.471097    | 1.267003    |
| 0.498714 | 0.722078 | 0.710788 | 0.513608    | 0.840967    |
| 0.253836 | 0.266555 | 0.195764 | 0.219375    | 0.442682    |
| 0.329529 | 0.235861 | 0.322306 | 0.435529    | 0.682446    |

**D. INS-1 CHOP 16h**

| Vehicle  | C16.0    | C18.1    | C16.0+C18.1 | Tunicamycin |
|----------|----------|----------|-------------|-------------|
| 0.210109 | 0.240953 | 0.326351 | 0.207606    | 0.456582    |
| 0.160895 | 0.494086 | 0.422976 | 0.436821    | 1.034611    |
| 0.138276 | 0.181319 | 0.19816  | 0.1734      | 0.807969    |
| 0.341225 | 0.311787 | 0.35772  | 0.430945    | 0.683465    |

Raw data for Fig. 5E-H: EndoC-βH1 cells were treated with either 250μM C16:0, 250μM C18:1, 250μM C19:0, 250μM C16:0 + 250μM C18:1, or 5μg/ml Tunicamycin for 6h or 16h. Total eIF2α, pEIF2α, CHOP and Western blotting and quantified as pEIF2α/total eIF2α ratio or CHOP/GAPDH ratio.

**E. EndoC-BH1 peif2a/eif 6h**

| Vehicle  | C16.0    | C18.1    | C16.0+C18.1 | C19:0    |
|----------|----------|----------|-------------|----------|
| 0.73787  | 0.61552  | 0.213996 | 0.225601    | 0.43138  |
| 0.710839 | 0.572077 | 0.293398 | 0.452821    | 0.381116 |
| 0.763446 | 0.411326 | 0.318784 | 0.613437    | 0.315201 |

**F. EndoC-BH1 peif2a/eif 18h**

| Vehicle  | C16.0    | C18.1    | C16.0+C18.1 | C19:0    | Tunicamycin |
|----------|----------|----------|-------------|----------|-------------|
| 0.850501 | 0.585974 | 0.349128 | 0.872201    | 0.86256  | 1.202224    |
| 0.852473 | 0.353947 | 0.186298 | 0.164667    | 0.194146 | 0.983159    |
| 0.492459 | 0.338988 | 0.329944 | 0.311498    | 0.189645 | 0.706628    |

**G. EndoC-BH1 CHOP 6h**

| Vehicle  | C16.0    | C18.1    | C16.0+C18.1 | C19:0    |
|----------|----------|----------|-------------|----------|
| 0.220275 | 0.206575 | 0.154855 | 0.014336    | 0.118543 |
| 0.370521 | 0.402648 | 0.338492 | 0.245298    | 0.242491 |
| 0.355876 | 0.134027 | 0.264036 | 0.449371    | 0.293785 |

**H. EndoC-BH1 CHOP 18h**

| Vehicle  | C16.0    | C18.1    | C16.0+C18.1 | C19:0    | Tunicamycin |
|----------|----------|----------|-------------|----------|-------------|
| 0.120117 | 0.225966 | 0.204019 | 0.149214    | 0.143958 | 0.305506    |
| 0.336496 | 0.22395  | 0.253194 | 0.075316    | 0.166249 | 1.904165    |
| 0.541734 | 0.362446 | 0.218513 | 0.253294    | 0.38567  | 1.080142    |
